# Supplementary material for: Glycosylated Lipopeptides—Synthesis and Evaluation of Antimicrobial Activity and Cytotoxicity
Source: MDPI journal article supplement (doi:10.3390/biom13010172), 2023-01-13
Supplement: s1 [file s1]

## Supplementary materials

# Glycosylated lipopeptides – synthesis and evaluation of anti-microbial activity and cytotoxicity

### Log<sub>2</sub>MIC vs adjusted retention time

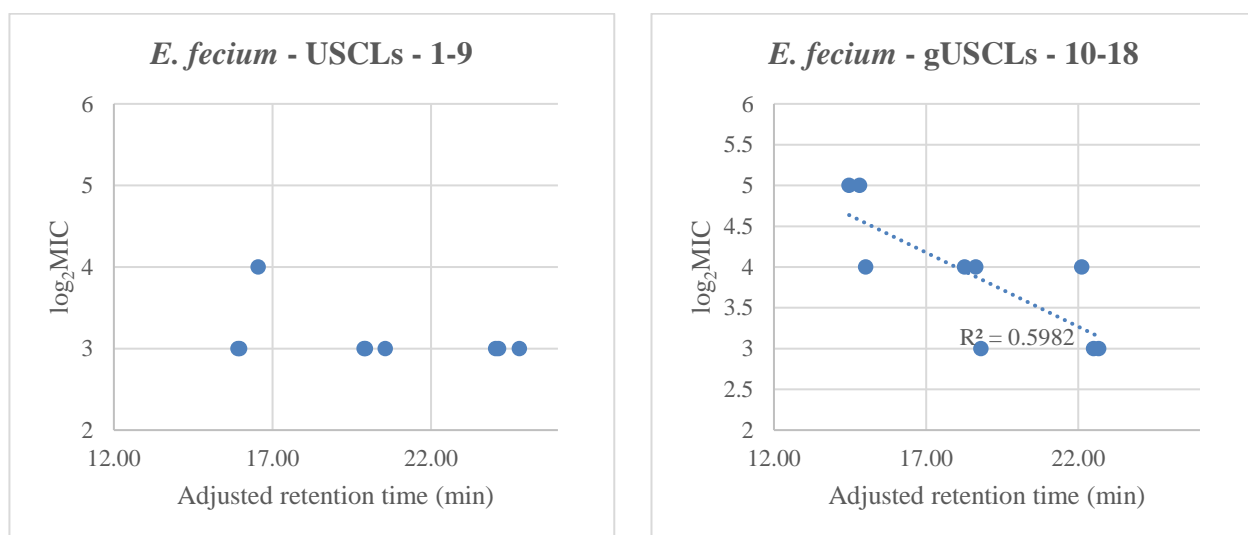

**Figure S1.** Log<sub>2</sub>MIC vs adjusted retention time for *E. fecium*.

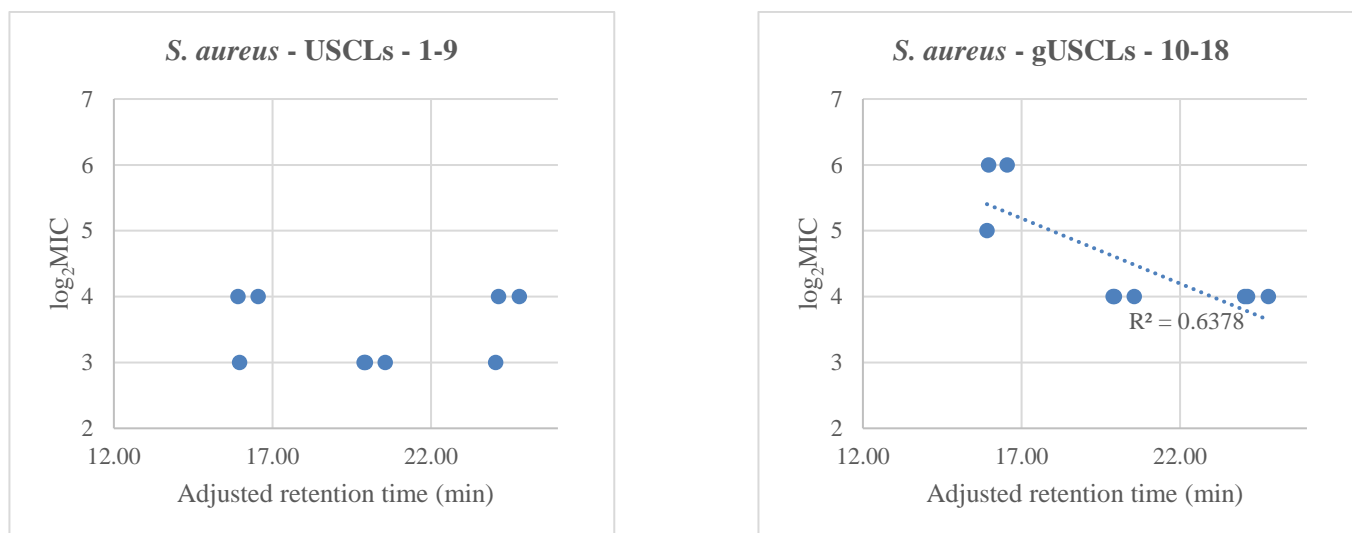

**Figure S2.** Log<sub>2</sub>MIC vs adjusted retention time for *S. aureus*.

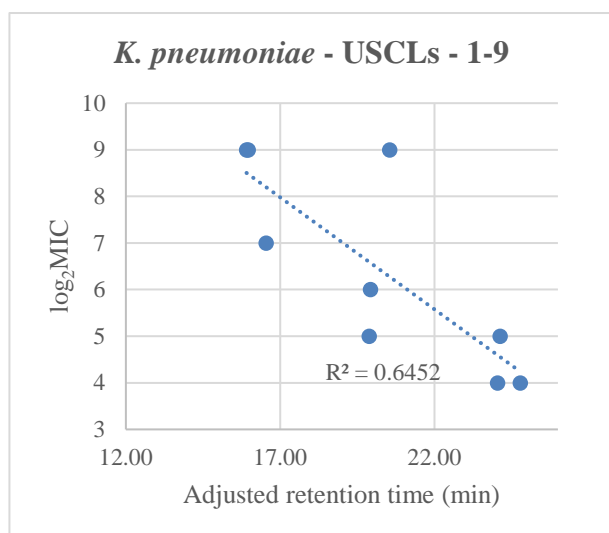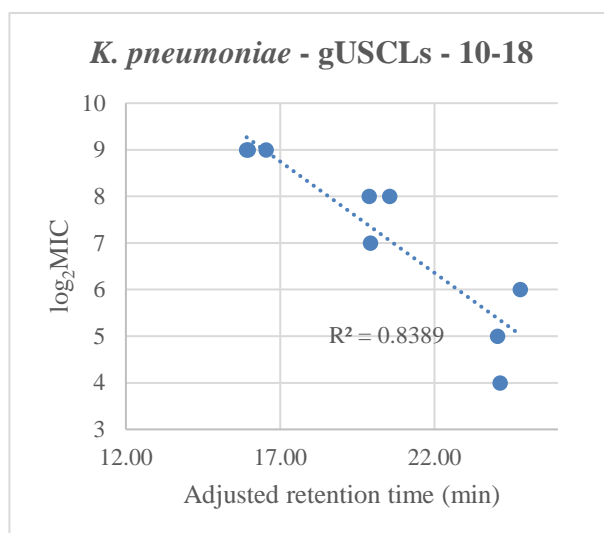

**Figure S3.** Log<sub>2</sub>MIC *vs* adjusted retention time for *K. pneumoniae*.

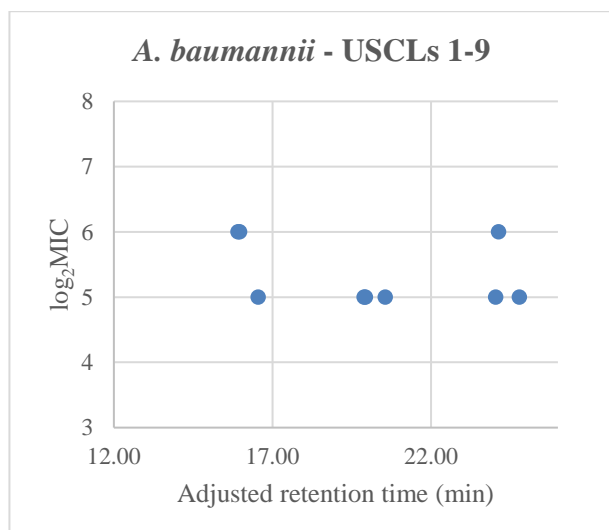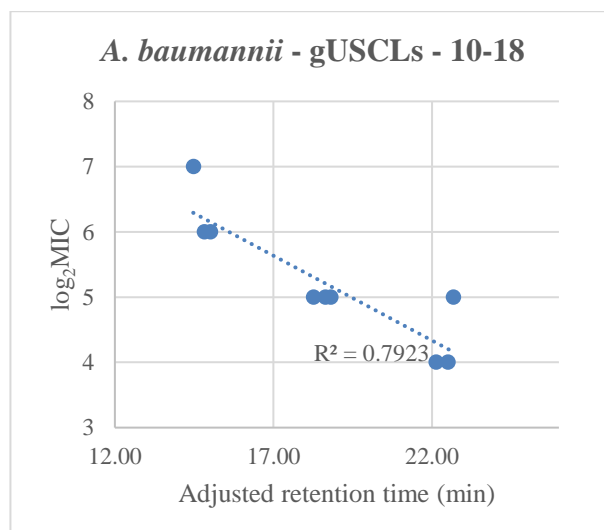

**Figure S4.** Log<sub>2</sub>MIC *vs* adjusted retention time for *A. baumannii*.

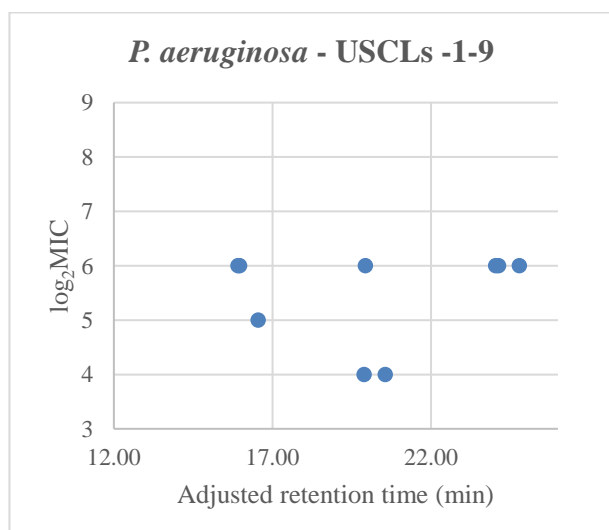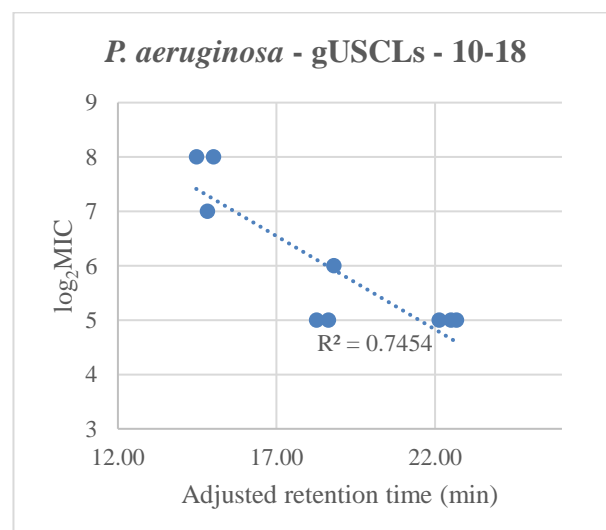

**Figure S5.** Log<sub>2</sub>MIC vs adjusted retention time for *P. aeruginosa*.

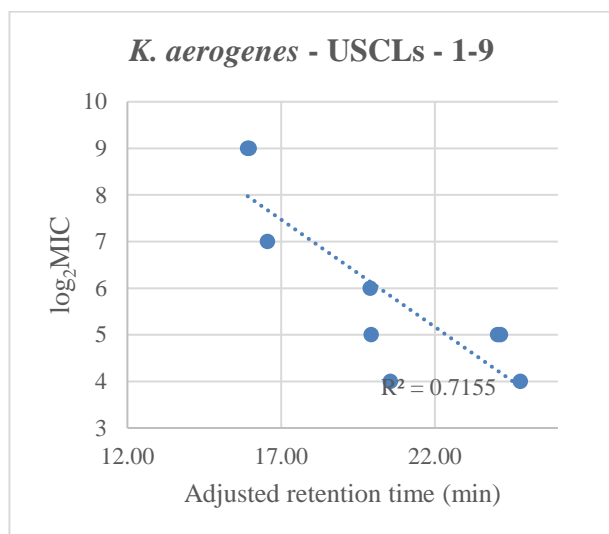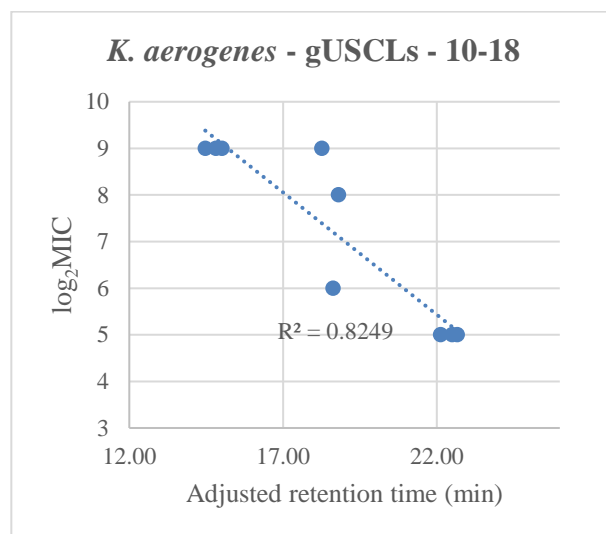

**Figure S6.** Log<sub>2</sub>MIC vs adjusted retention time for *K. aerogenes*.

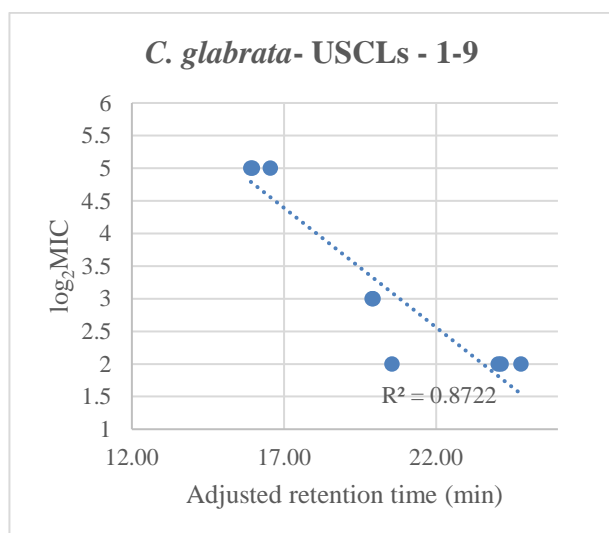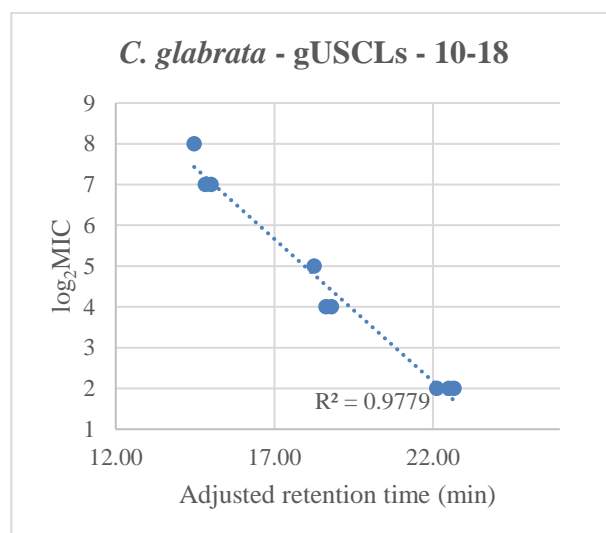

**Figure S7.** Log<sub>2</sub>MIC vs adjusted retention time for *C. glabrata*.

## Log<sub>2</sub>SI (HC<sub>50</sub>) vs adjusted retention time

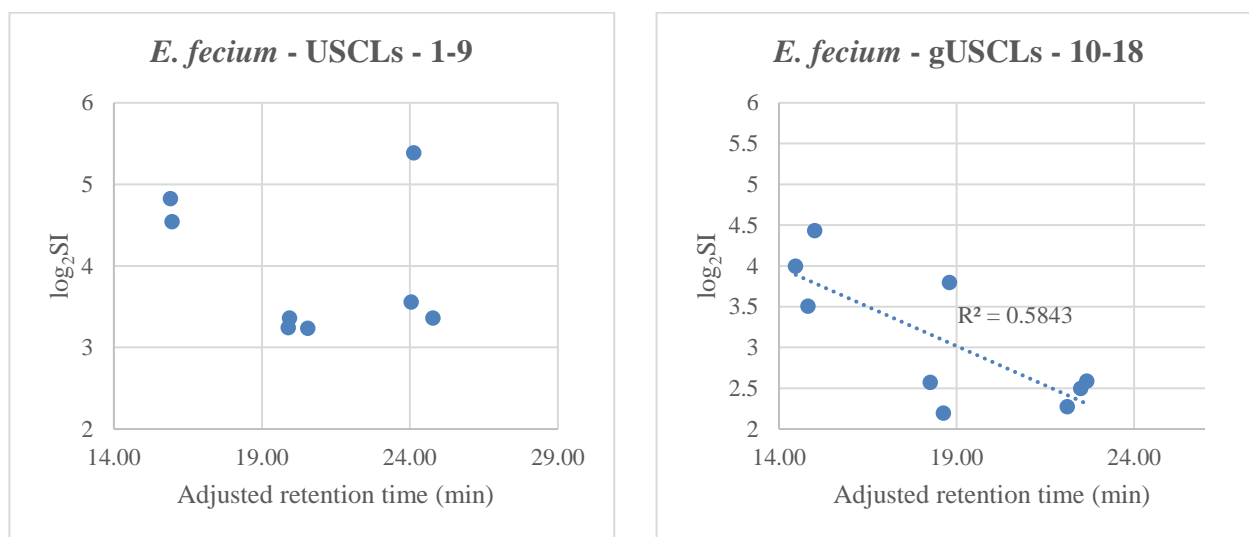

**Figure S8.** Log<sub>2</sub>SI (HC<sub>50</sub>) vs adjusted retention time for *E. fecium*.

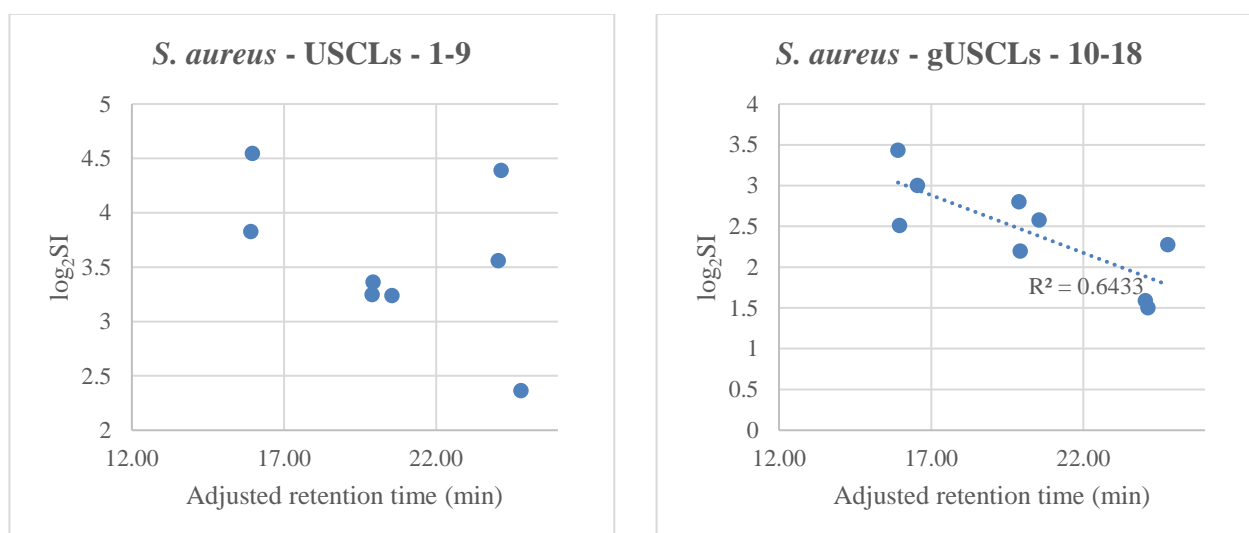

**Figure S9.** Log<sub>2</sub>SI (HC<sub>50</sub>) vs adjusted retention time for *S. aureus*.

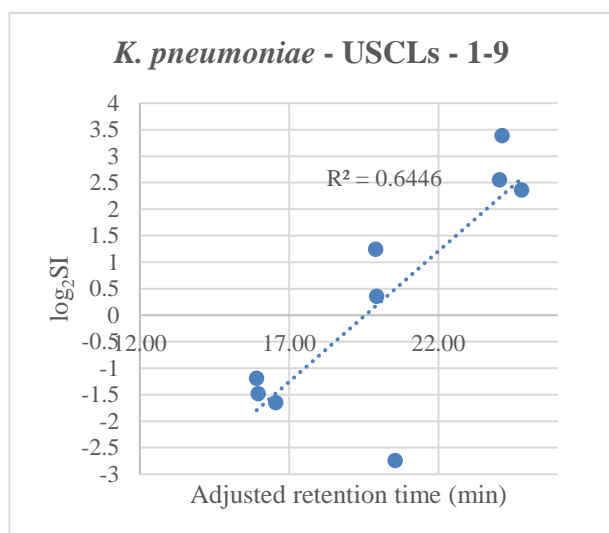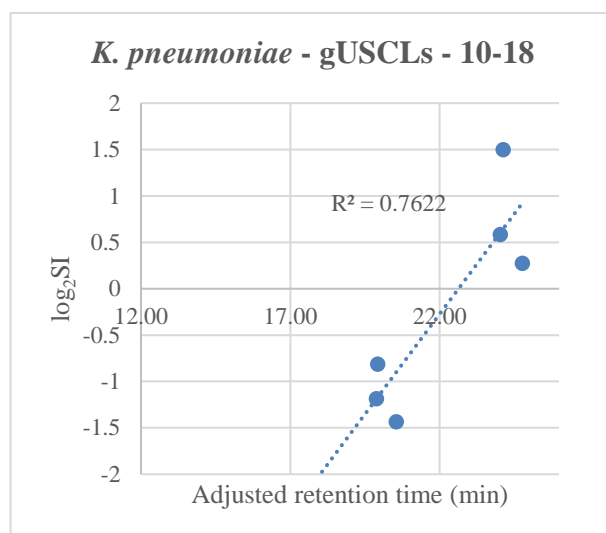

**Figure S10.** Log<sub>2</sub>SI (HC<sub>50</sub>) vs adjusted retention time for *K. pneumoniae*.

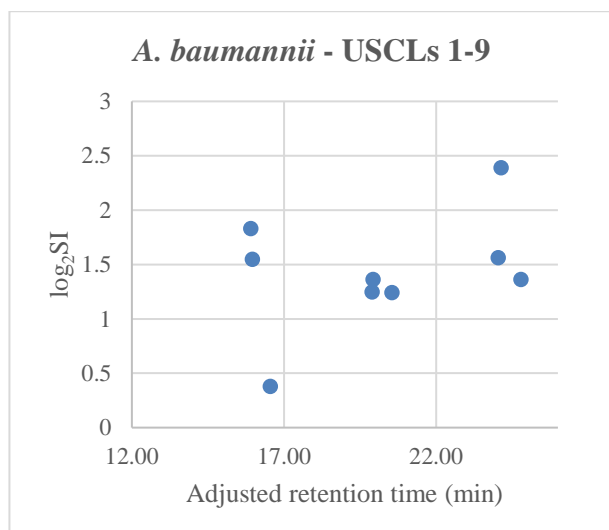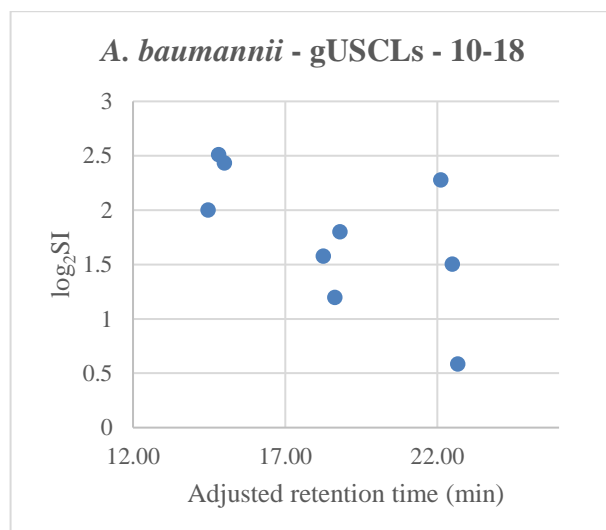

**Figure S11.** Log<sub>2</sub>SI (HC<sub>50</sub>) vs adjusted retention time for *A. baumannii*.

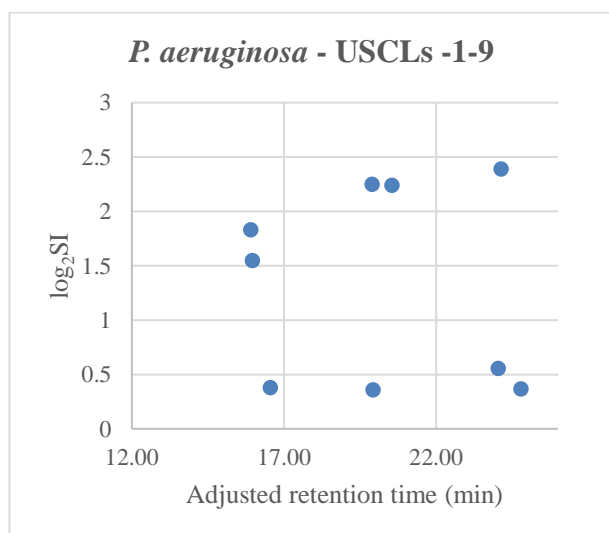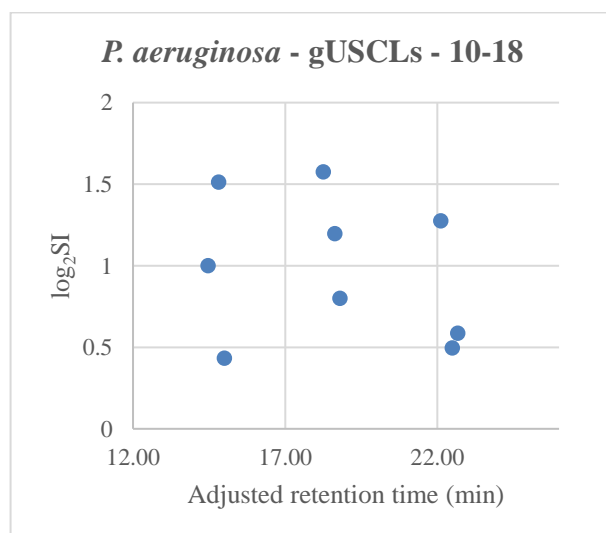

**Figure S12.** Log<sub>2</sub>SI (HC<sub>50</sub>) vs adjusted retention time for *P. aeruginosa*.

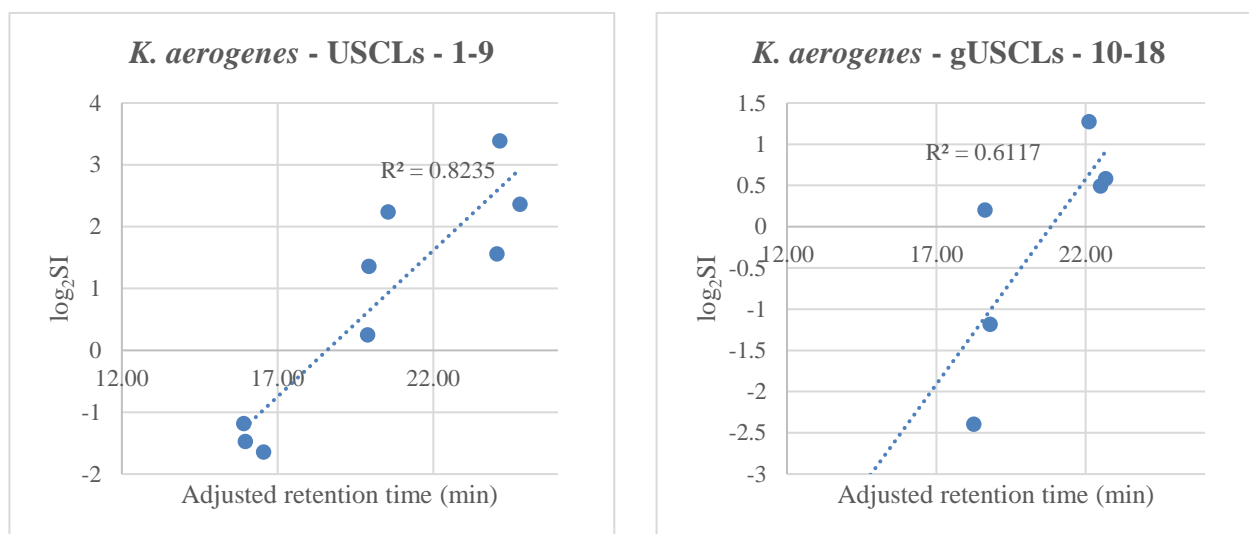

**Figure S13.** Log<sub>2</sub>SI (HC<sub>50</sub>) vs adjusted retention time for *K. aerogenes*.

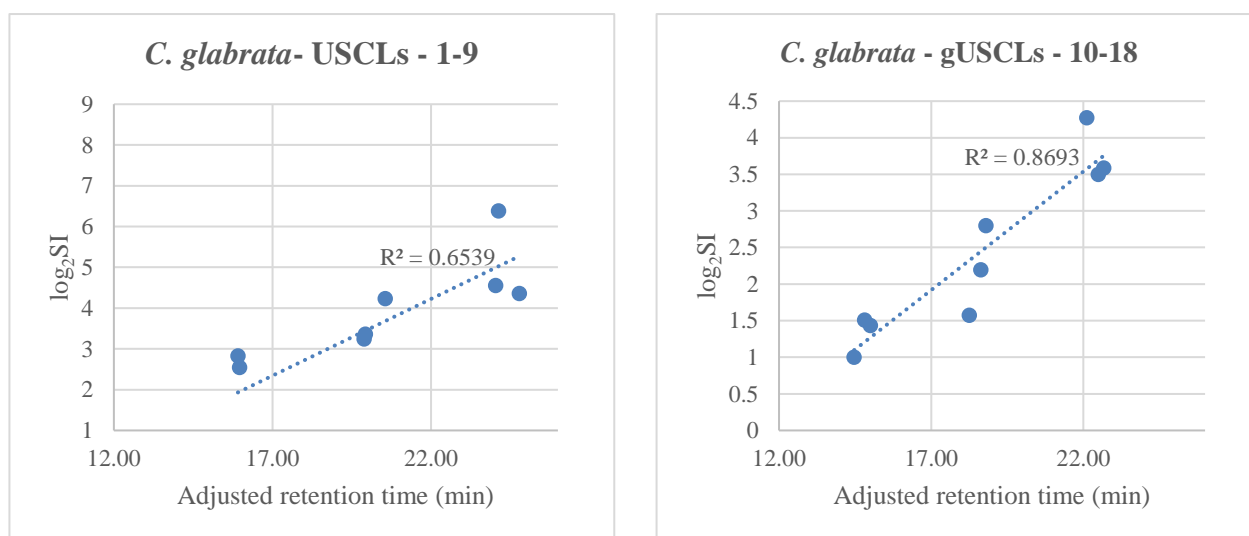

**Figure S14.** Log<sub>2</sub>SI (HC<sub>50</sub>) vs adjusted retention time for *C. glabrata*.

Log<sub>2</sub>SI (IC<sub>50</sub>) vs adjusted retention time

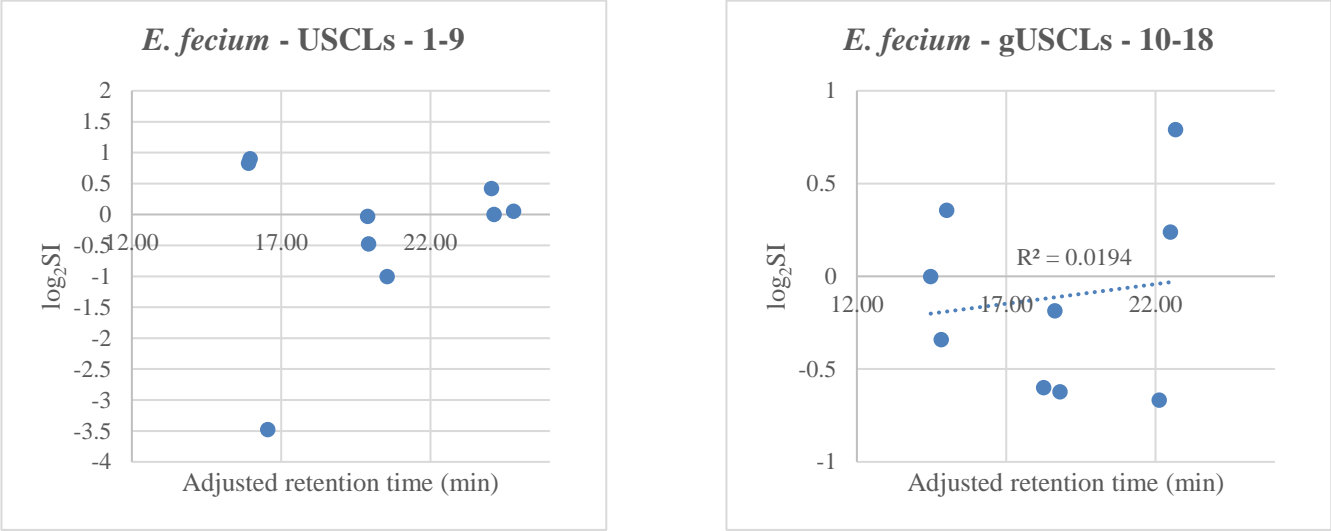

Figure S15. Log<sub>2</sub>SI (IC<sub>50</sub>) vs adjusted retention time for *E. fecium*.

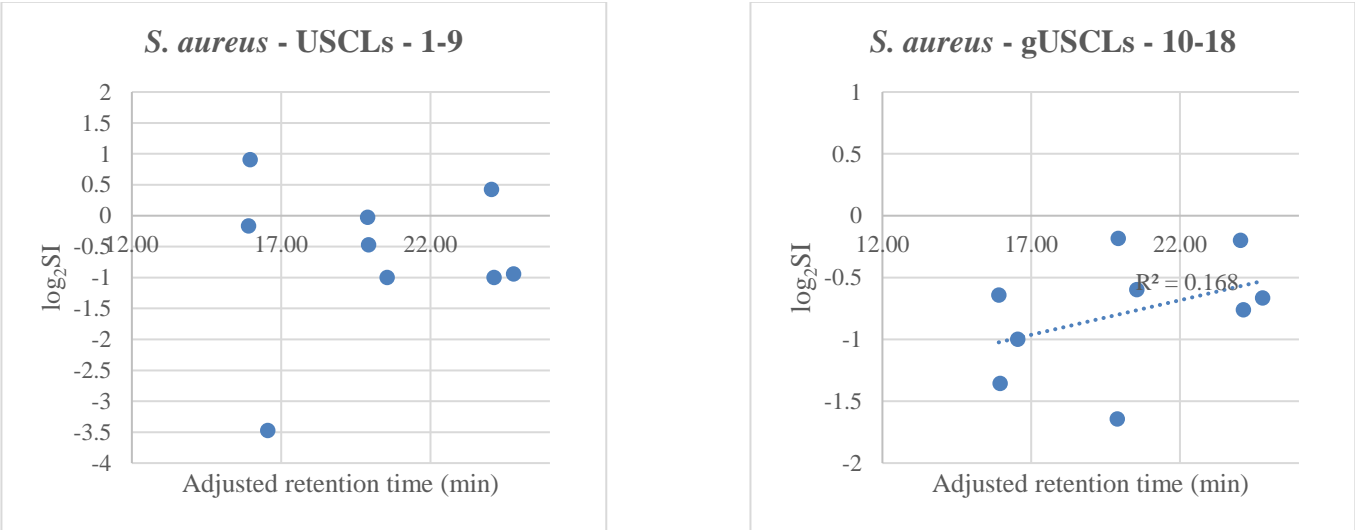

Figure S16. Log<sub>2</sub>SI (IC<sub>50</sub>) vs adjusted retention time for *S. aureus*.

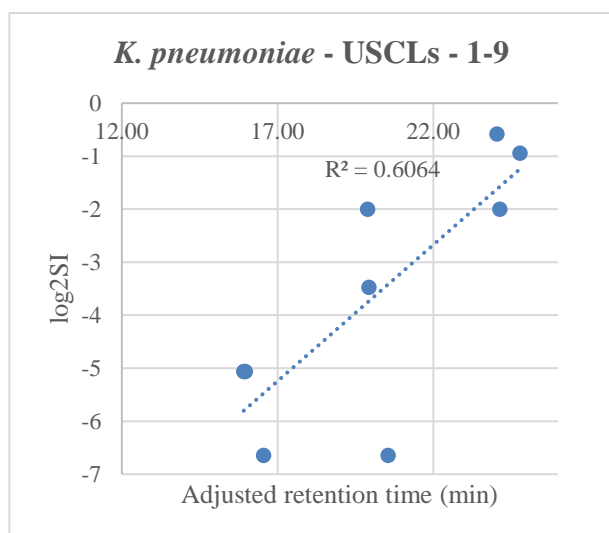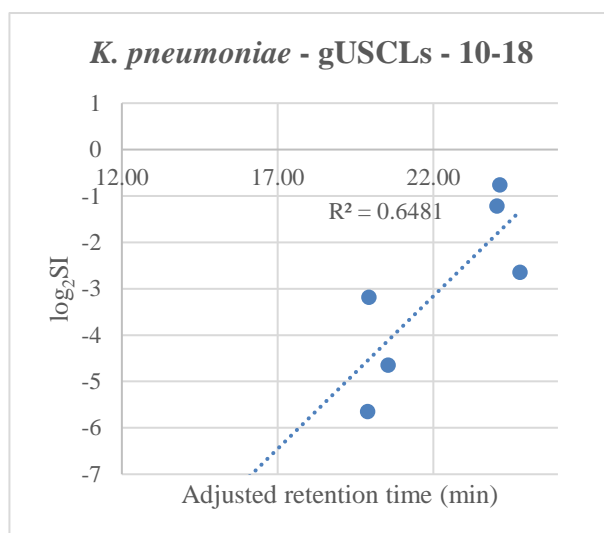

**Figure S17.** Log<sub>2</sub>SI (IC<sub>50</sub>) vs adjusted retention time for *K. pneumoniae*.

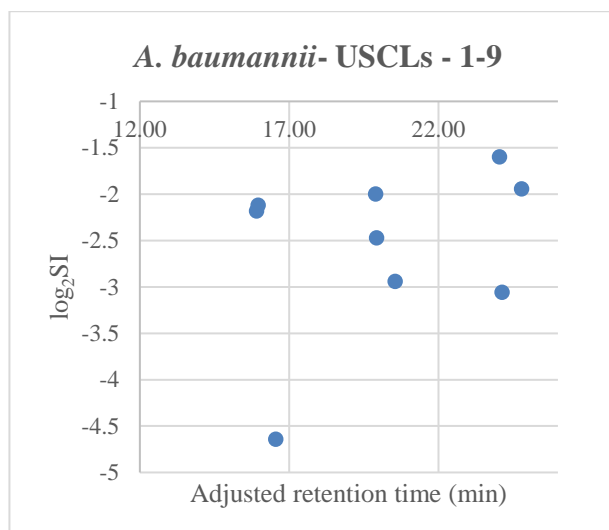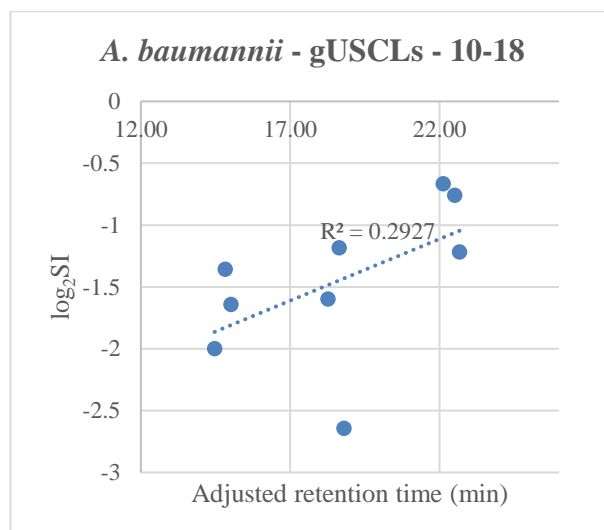

**Figure S18.** Log<sub>2</sub>SI (IC<sub>50</sub>) vs adjusted retention time for *A. baumannii*.

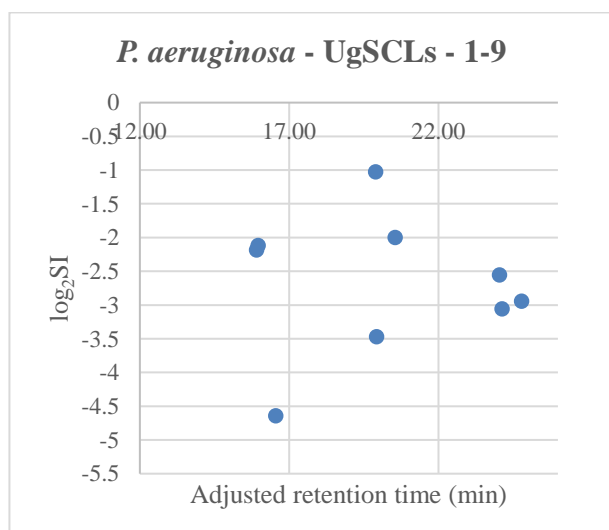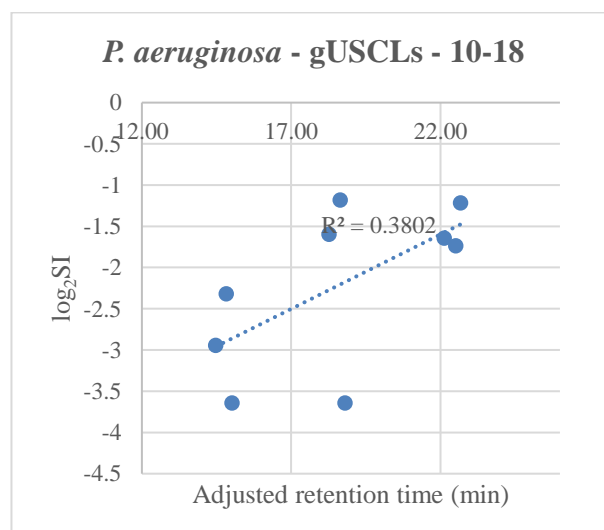



**Figure S19.** Log<sub>2</sub>SI (IC<sub>50</sub>) vs adjusted retention time for *P. aeruginosa*.

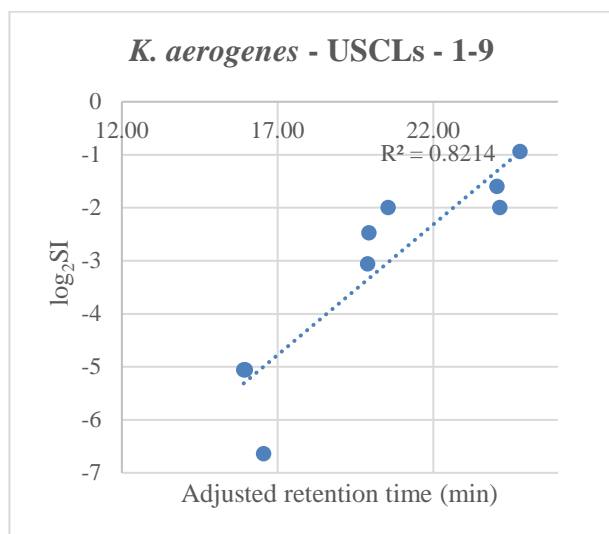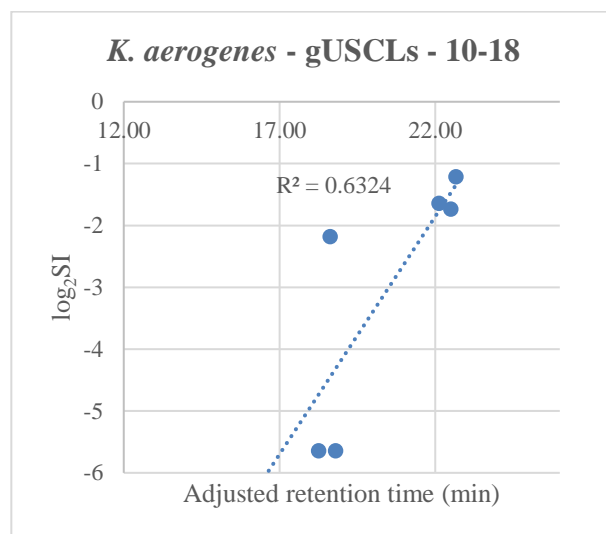

**Figure S20.** Log<sub>2</sub>SI (IC<sub>50</sub>) vs adjusted retention time for *K. aerogenes*.

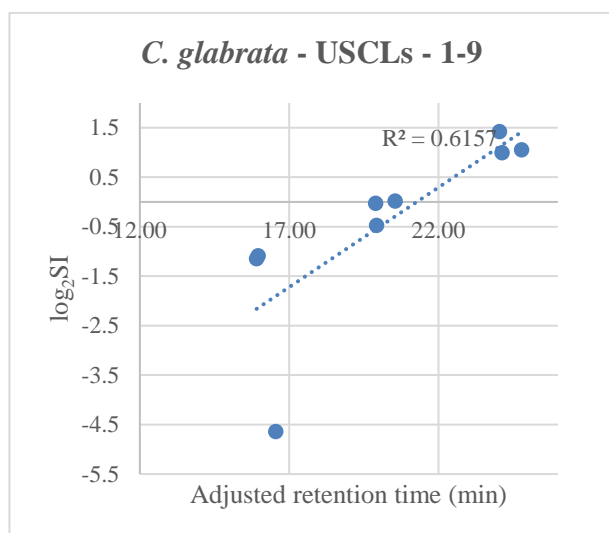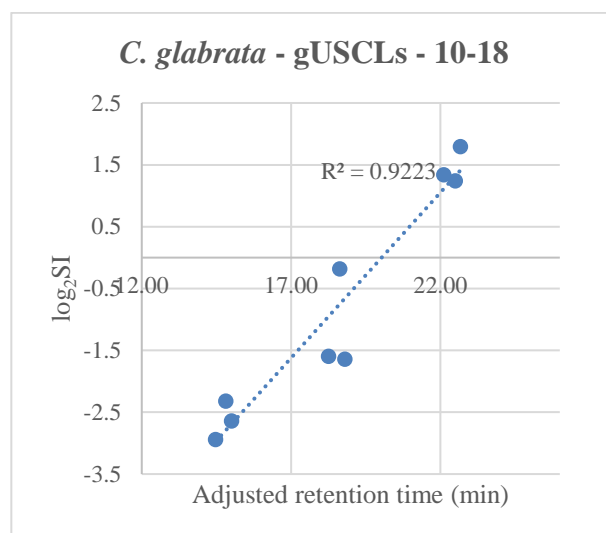

**Figure S21.** Log<sub>2</sub>SI (IC<sub>50</sub>) vs adjusted retention time for *C. glabrata*.
